# Supplementary material for: Online Prediction of Health Care Utilization in the Next Six Months Based on Electronic Health Record Information: A Cohort and Validation Study
Source: PubMed Central journal article supplement (PMC4642374; doi:10.2196/jmir.4976), 2015-09-22

### Retrospective cohort

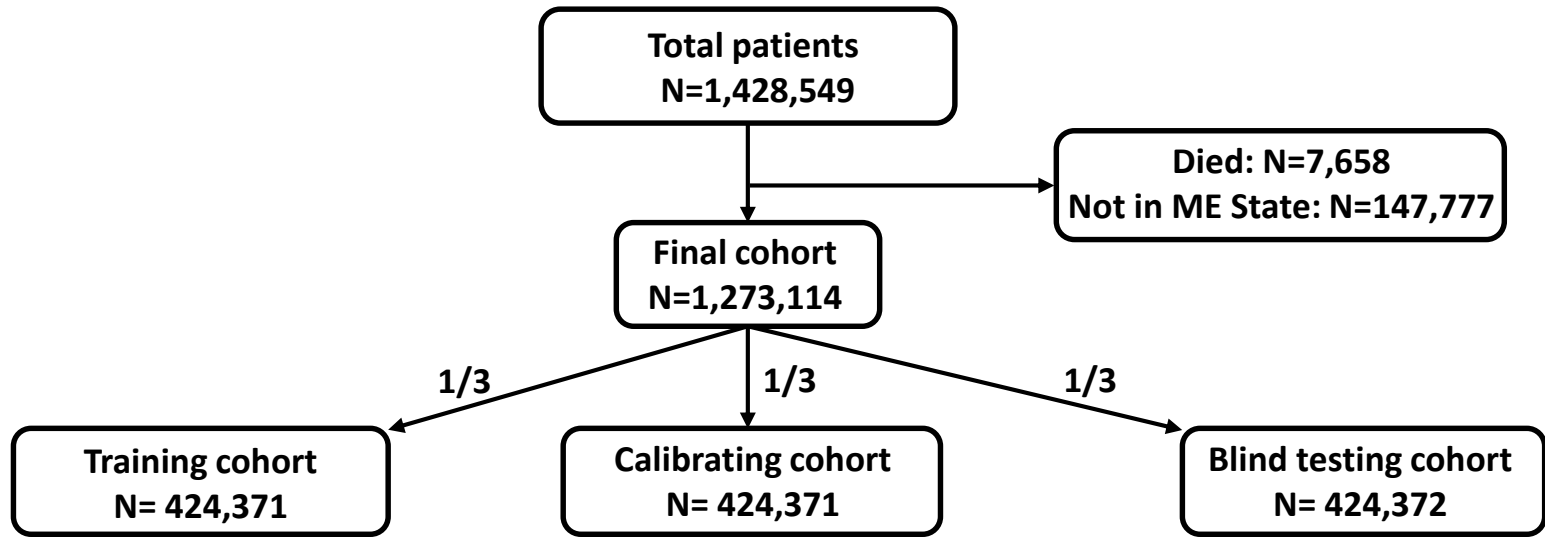

### Prospective cohort

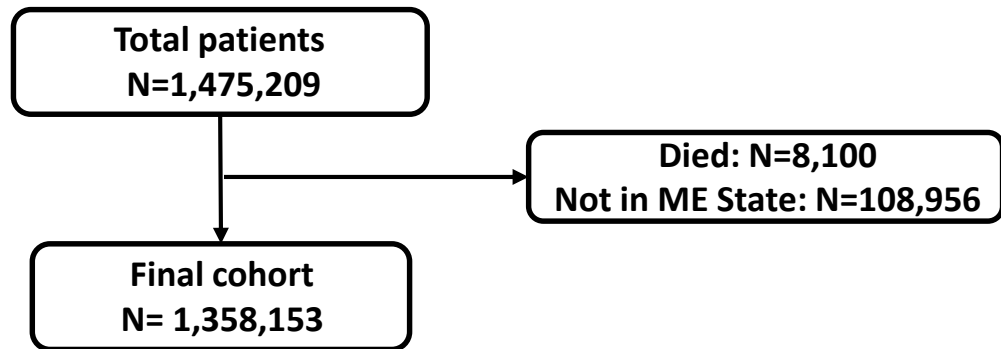

Supplement: jmir_v17i9e219_app2.pdf [file jmir_v17i9e219_app2.pdf]
